# Supplementary material for: A Scoping Review of Maternal and Child Health Clinicians Attitudes, Beliefs, Practice, Training and Perceived Self-Competence in Environmental Health
Source: Int J Environ Res Public Health. 2015 Dec 10;12(12):15769–81. doi: 10.3390/ijerph121215018 (PMC4690954; doi:10.3390/ijerph121215018)
Supplement: Supplementary File 1 [file ijerph-12-15018-s001.pdf]

# A Scoping Review of Maternal and Child Health Clinicians Attitudes, Beliefs, Practice, Training and Perceived Self-Competence in Environmental Health

## CINAHL

| Search ID | Search Item                                                                                                                                                  | Limiters          | Retrieved Items |
|-----------|--------------------------------------------------------------------------------------------------------------------------------------------------------------|-------------------|-----------------|
| S1        | (MH "Midwifery+")                                                                                                                                            |                   | 3080            |
| S2        | (MH "Midwives+")                                                                                                                                             |                   | 8293            |
| S3        | (MH "Novice Clinicians+") OR (MH "Expert Clinicians+")                                                                                                       |                   | 13815           |
| S4        | (MH "Nurses+")                                                                                                                                               |                   | 150,591         |
| S5        | (MH "Physicians+")                                                                                                                                           |                   | 52,175          |
| S6        | (MH "Pediatricians")                                                                                                                                         |                   | 1334            |
| S7        | (MH "Pediatrics+")                                                                                                                                           |                   | 7459            |
| S8        | (MH "Medicine+") OR (MH "Obstetrics")<br>(MH "Gynecology")                                                                                                   |                   | 82,879          |
| S9        | (MH "Knowledge+")                                                                                                                                            |                   | 30426           |
| S10       | (MH "Education+")                                                                                                                                            |                   | 468,242         |
| S11       | (MH "Attitude+")                                                                                                                                             |                   | 209,479         |
| S12       | (MH "Behavior+")<br>(MH "Professional Practice+") OR (MH "Nursing Practice") OR<br>(MH "Medical Practice")                                                   |                   | 453,176         |
| S13       | OR (MH "Practice Patterns") OR (MH "Professional Practice,<br>evidence-Based") OR (MH "Professional Practice, theory-Based")<br>OR (MH "Scope of Practice+") |                   | 146,321         |
| S14       | (MH "Environmental Health")                                                                                                                                  |                   | 3718            |
| S15       | (MH "Environmental Exposure")                                                                                                                                |                   | 22,564          |
| S16       | (MH "Environmental Pollution")                                                                                                                               |                   | 48,441          |
| S17       | (MH "Environmental Pollutants, Pesticides (Non-Cinahl)+") OR<br>(MH "Environmental Pollutants+")                                                             |                   | 11955           |
| S18       | S1 OR S2 OR S3 OR S4 OR S5 OR S6 OR S7 OR S8                                                                                                                 |                   | 288,338         |
| S19       | S9 OR S10 OR S11 OR S12 OR S13                                                                                                                               |                   | 891,869         |
| S20       | S14 OR S15 OR S16 OR S17                                                                                                                                     |                   | 57,293          |
| S21       | S18 AND S19 AND S20                                                                                                                                          |                   | 1224            |
| S22       | S18 AND S19 AND S20                                                                                                                                          | 20000101–20141231 | 1042            |

## EMBASE

| Search ID | Search Item                                             | Retrieved Items |
|-----------|---------------------------------------------------------|-----------------|
| 1.        | Obstetrician.mp. or exp obstetrics or exp obstetrician/ | 38,263          |
| 2         | Gynaecologist.mp or gynecologist                        | 3697            |
| 3         | Gynaecology.mp or exp gynecology                        | 40,926          |
| 4         | Pediatrician.mp. or exp pediatrician                    | 17,142          |

**EMBASE Cont.**

| Search ID | Search Item                                                                                                                                                                                                                                                     | Retrieved Items |
|-----------|-----------------------------------------------------------------------------------------------------------------------------------------------------------------------------------------------------------------------------------------------------------------|-----------------|
| 5         | Pediatrics.mp. or exp pediatrics/                                                                                                                                                                                                                               | 117,181         |
| 6         | Exp physician or physician.mp.                                                                                                                                                                                                                                  | 597,061         |
| 7         | Midwife.mp. or exp midwife/                                                                                                                                                                                                                                     | 24,759          |
| 8         | Midwifery.mp                                                                                                                                                                                                                                                    | 7195            |
| 9         | Exp nurse or nurse.mp.                                                                                                                                                                                                                                          | 226,203         |
| 10        | Nursing or nursing.mp                                                                                                                                                                                                                                           | 512,727         |
| 11        | Environmental health.mp. or exp environmental health/                                                                                                                                                                                                           | 39,082          |
| 12        | Environmental exposure.mp or exp environmental exposure/                                                                                                                                                                                                        | 79,988          |
| 13        | Environmental pollution. mp. Or exp pollution/                                                                                                                                                                                                                  | 285,689         |
| 14        | Exp pollution or pollution.mp.                                                                                                                                                                                                                                  | 309,506         |
| 15        | Pollutants.mp or exp pollutant                                                                                                                                                                                                                                  | 257,037         |
| 16        | Exp knowledge or knowledge.mp.                                                                                                                                                                                                                                  | 536,070         |
| 17        | Training.mp. training                                                                                                                                                                                                                                           | 393,203         |
| 18        | Behaviour.mp. or behavior                                                                                                                                                                                                                                       | 315,360         |
| 19        | Exp good clinical practice or exp nursing practice or exp health care practice or exp practice guideline or exp professional practice or exp clinical practice or exp advanced practice nursing or practice.mp. or exp medical practice or exp general practice | 1,132,757       |
| 20        | Esp education or education.mp.                                                                                                                                                                                                                                  | 1,193,419       |
| 21        | Exp competence/ or exp professional competence/ or exp clinical competence/ or exp nursing competence or competence.mp                                                                                                                                          | 124,361         |
| 22        | Skill.mp or skill                                                                                                                                                                                                                                               | 76928           |
| 23        | 16 or 17 or 18 or 19 or 20 or 21 or 22                                                                                                                                                                                                                          | 3,016,509       |
| 24        | 11 or 12 or 13 or 14 or 15                                                                                                                                                                                                                                      | 509,114         |
| 25        | 1 or 2 or 3 or 4 or 5 or 6 or 7 or 8 or 9 or 10                                                                                                                                                                                                                 | 1,325,433       |
| 26        | 23 and 24 and 25                                                                                                                                                                                                                                                | 2745            |
| 27        | Limit 26 to (English language and year = "2000–Current")                                                                                                                                                                                                        | 1946            |

**MEDLINE**

| Search ID | Search Item                                                    | Retrieved Items |
|-----------|----------------------------------------------------------------|-----------------|
| 1         | Exp obstetrics or exp delivery, Obstetrics or obstetrician.mp. | 80,229          |
| 2         | Exp Gynecology or gynaecologist.mp.                            | 14,515          |
| 3         | Gynecology or gynecologist.mp.                                 | 15,591          |
| 4         | Exp pediatrics or pediatrician.mp.                             | 48,024          |
| 5         | Physician.mp. or exp Physicians                                | 270,577         |
| 6         | Midwifery.mp or exp midwifery                                  | 18,615          |
| 7         | Midwife.mp.                                                    | 4046            |
| 8         | Nurse.mp. or exp nurses/                                       | 163,491         |
| 9         | Exp Nursing or Nursing.mp.                                     | 474,488         |
| 10        | Environmental health.mp. exp environmental health              | 24,718          |
| 11        | Environmental exposure.mp. or exp Environmental exposure       | 180,839         |
| 12        | Environmental pollutants.mp. or exp Environmental pollutants   | 192,446         |
| 13        | Pollutants                                                     | 173,019         |
| 14        | Pollution                                                      | 100,382         |
| 15        | Knowledge.mp. or knowledge                                     | 474,020         |

**MEDLINE *Cont.***

| Search ID | Search Item                                              | Retrieved Items |
|-----------|----------------------------------------------------------|-----------------|
| 16        | Training.mp.                                             | 285,624         |
| 17        | Behaviours.mp                                            | 26,693          |
| 18        | Practice.mp.                                             | 706,875         |
| 19        | Exp attitude or attitude.mp.                             | 294,943         |
| 20        | Belief.mp. or exp culture                                | 138,345         |
| 21        | Education.mp. or exp education                           | 812,543         |
| 22        | Competence.mp.                                           | 119,043         |
| 23        | Competency.mp. or exp competency-based education/        | 23,641          |
| 24        | Skills.mp.                                               | 113,012         |
| 25        | 15 or 16 or 17 or 18 or 19 or 20 or 21 or 22 or 23 or 24 | 2,140,176       |
| 26        | 10 or 11 or 12 or 13 or 14                               | 909,407         |
| 27        | 1 or 2 or 3 or 4 or 5 or 6 or 7 or 8 or 9                | 380,829         |
| 28        | 25 and 26 and 27                                         | 1927            |
| 29        | Limit 28 to year = "2000–Current"                        | 1263            |

**Scopus**

(( TITLE-ABS-KEY ( obstetrician\* ) OR TITLE-ABS-KEY ( pediatrician\* ) OR TITLE-ABS-KEY ( physician\* ) OR TITLE-ABS-KEY ( paediatrician\* ) OR TITLE-ABS-KEY ( midwife\* ) OR TITLE-ABS-KEY ( nurs\* ) OR TITLE-ABS-KEY ( gynaecolog\* ) OR TITLE-ABS-KEY ( clinician\* ) OR TITLE-ABS-KEY ( gynaecolog\* ) ) ) AND ( ( TITLE-ABS-KEY ( knowledge\* ) OR TITLE-ABS-KEY ( training\* ) OR TITLE-ABS-KEY ( attitude\* ) OR TITLE-ABS-KEY ( practic\* ) OR TITLE-ABS-KEY ( educat\* ) OR TITLE-ABS-KEY ( competenc\* ) OR TITLE-ABS-KEY ( belief\* ) OR TITLE-ABS-KEY ( skill\* ) ) ) AND ( ( TITLE-ABS-KEY ( environmental health\* ) OR TITLE-ABS-KEY ( environmental exposure ) OR TITLE-ABS-KEY ( environmental pollut\* ) OR TITLE-ABS-KEY ( pollut\* ) ) ) AND ( LIMIT-TO ( PUBYEAR , 2014 ) OR LIMIT-TO ( PUBYEAR , 2013 ) OR LIMIT-TO ( PUBYEAR , 2012 ) OR LIMIT-TO ( PUBYEAR , 2011 ) OR LIMIT-TO ( PUBYEAR , 2010 ) OR LIMIT-TO ( PUBYEAR , 2009 ) OR LIMIT-TO ( PUBYEAR , 2008 ) OR LIMIT-TO ( PUBYEAR , 2007 ) OR LIMIT-TO ( PUBYEAR , 2006 ) OR LIMIT-TO ( PUBYEAR , 2005 ) OR LIMIT-TO ( PUBYEAR , 2004 ) OR LIMIT-TO ( PUBYEAR , 2003 ) OR LIMIT-TO ( PUBYEAR , 2002 ) OR LIMIT-TO ( PUBYEAR , 2001 ) OR LIMIT-TO ( PUBYEAR , 2000 ) ) AND ( LIMIT-TO ( LANGUAGE , "English" ) ) )

Total articles retrieved = 4626

**Pubmed**

Search: ((((((((((clinician\*[Text Word]) OR (((("gynecology"[MeSH Terms]) OR gynecology\*[Text Word]) OR gynaecology[Text Word])) OR ((("obstetrics"[MeSH Terms]) OR obstetric\*[Text Word])) OR (((("nurses"[MeSH Terms]) OR nurses\*[Text Word]) OR "nursing"[MeSH Terms]) OR nursing\*[Text Word])) OR (((midwife[MeSH Terms]) OR midwifery[MeSH Terms]) OR midwife[Text Word]) OR midwifery[Text Word])) OR ((("physicians"[MeSH Terms]) OR physician\*[Text Word])) OR ((("pediatrics"[MeSH Terms]) OR pediatric\*[Text Word])) OR paediatric\*[Text Word])) AND (((((((("environmental health"[MeSH Terms]) OR "environmental pollution"[MeSH Terms]) OR environmental exposure[MeSH Terms]) OR "environmental pollutants"[MeSH Terms]) OR environmental health\*[Text Word]) OR environmental exposure\*[Text Word]) OR environmental pollution\*[Text Word]) OR environmental pollutants\*[Text Word]) OR pollution\*[Text Word]) OR pollutants\*[Text Word])) AND (((((((("knowledge"[MeSH Terms]) OR knowledge\*[Text Word]) OR "attitude"[MeSH Terms]) OR attitude\*[Text Word]) OR professional practice[MeSH Terms]) OR practice\*[Text

Word)) OR "culture"[MeSH Terms]) OR belief\*[Text Word]) OR "clinical competence"[MeSH Terms]) OR competenc\*[Text Word]) OR skill\*[Text Word]) OR "education"[MeSH Terms]) OR educat\*[Text Word]) Filters: Publication date from 2000/01/01 to 2014/12/31; English

Total articles retrieved = 2412

**Table S1.** Showing Author, study method, sample population and study location.

| Author Name                       | Author # | Study Method                                | Sample Population                                           | Location           |
|-----------------------------------|----------|---------------------------------------------|-------------------------------------------------------------|--------------------|
| (Chai <i>et al.</i> 2001)         | 1        | Cross-sectional-Quantitative                | General practitioners, Pediatricians,<br>Physicians, Nurses | Northwest—U.S.A    |
| (Ngowi <i>et al.</i> 2001)        | 2        | Cross-sectional-Quantitative                | Physicians, Nurses, Midwives                                | Tanzania           |
| (Woolf and Cimino 2001)           | 3        | Cross-sectional-Quantitative                | Pediatricians, Nurses                                       | Boston—U.S.A       |
| (Perez-Stable <i>et al.</i> 2001) | 4        | Cross-sectional-Quantitative                | Physicians, Pediatricians                                   | California—U.S.A   |
| (Aekplakorn <i>et al.</i> 2002)   | 5        | Cross-sectional-Quantitative                | General Physicians                                          | Thailand           |
| (Van Dongen 2002)                 | 6        | Cross-sectional-Quantitative                | Nurses                                                      | U.S.A              |
| (Kilpatrick <i>et al.</i> 2002)   | 7        | Cross-sectional-Quantitative                | Pediatricians                                               | Georgia—U.S.A      |
| (Cabana <i>et al.</i> 2004)       | 8        | Cross-sectional-Quantitative                | Pediatricians                                               | U.S.A              |
| (Hannöver <i>et al.</i> 2004)     | 9        | Cross-sectional-Quantitative                | Pediatricians                                               | Germany            |
| (Murshed <i>et al.</i> 2004)      | 10       | Cross-sectional-Quantitative                | Clinicians                                                  | Dhaka—Bangladesh   |
| (Balk <i>et al.</i> 2004)         | 11       | Cross-sectional-Quantitative                | Pediatricians                                               | U.S.A              |
| (Stevens <i>et al.</i> 2004)      | 12       | Cross-sectional-Quantitative                | General Practitioners, Nurses                               | U.K                |
| (Hamilton <i>et al.</i> 2005)     | 13       | Cross-sectional-Quantitative                | Physicians                                                  | Texas—U.S.A        |
| (Soto Mas <i>et al.</i> 2005)     | 14       | Cross-sectional-Quantitative                | Physicians                                                  | New Mexico—U.S.A   |
| (Thyrian <i>et al.</i> 2006)      | 15       | Cross-sectional-Quantitative                | Midwives                                                    | Pomerania—Germany  |
| (Balbus <i>et al.</i> 2006)       | 16       | Cross-sectional-Mixed                       | Physicians, Physician Assistants,<br>Pediatricians, Nurses  | Washington—U.S.A   |
| (Buka <i>et al.</i> 2006)         | 17       | Cross-sectional-Quantitative                | Nurses, Physicians                                          | Alberta—Canada     |
| (Hu <i>et al.</i> 2006)           | 18       | Cross-sectional-Quantitative                | Pediatricians                                               | New York—U.S.A     |
| (Karr <i>et al.</i> 2006)         | 19       | Cross-sectional-Quantitative                | Physicians, Nurses                                          | Northwest—USA      |
| (Nicotera <i>et al.</i> 2006)     | 20       | Cross-sectional-Quantitative                | Physicians                                                  | Calabria—Italy     |
| (Trasande <i>et al.</i> 2006b)    | 21       | Cross-sectional-Quantitative                | Pediatricians                                               | Wisconsin—U.S.A    |
| (Trasande <i>et al.</i> 2006a)    | 22       | Cross-sectional-Quantitative                | Pediatricians                                               | New York—U.S.A     |
| (Abatemarco <i>et al.</i> 2007)   | 23       | Cross-sectional-Quantitative                | Midwives                                                    | New Jersey—U.S.A   |
| (Collins <i>et al.</i> 2007)      | 24       | Cross-sectional-Quantitative                | Pediatricians                                               | Philadelphia—U.S.A |
| (Garg <i>et al.</i> 2007)         | 25       | Cross-sectional-(Intervention)-Quantitative | Pediatricians, Physicians                                   | Pennsylvania—U.S.A |

Table S1. *Cont.*

| Author Name                        | Author # | Study Method                                    | Sample Population                                                  | Location         |
|------------------------------------|----------|-------------------------------------------------|--------------------------------------------------------------------|------------------|
| (Canadian Nurses Association 2008) | 26       | Cross-sectional-Quantitative                    | Nurses                                                             | Canada           |
| (Glover <i>et al.</i> 2008)        | 27       | Cross-sectional-Quantitative                    | General Practitioners, Midwives                                    | New Zealand      |
| (Rafique <i>et al.</i> 2008)       | 28       | Cross-sectional-Quantitative                    | Physicians                                                         | Pakistan         |
| (Trasande <i>et al.</i> 2008)      | 29       | Cross-sectional-Quantitative                    | Pediatrician                                                       | Minnesota—U.S.A  |
| (Carlsson <i>et al.</i> 2010)      | 30       | Cross-sectional-Quantitative                    | Nurses                                                             | Sweden           |
| (Deckter <i>et al.</i> 2009)       | 31       | Cross-sectional-Quantitative                    | Nurses                                                             | Cincinnati—U.S.A |
| (Fadhil 2009)                      | 32       | Cross-sectional-Quantitative                    | Physicians                                                         | Bahrain          |
| (Kowall <i>et al.</i> 2010)        | 33       | Cross-sectional-Quantitative                    | General-Practitioner                                               | Germany          |
| (Mejia <i>et al.</i> 2010)         | 34       | Cross-sectional-Quantitative                    | Gynecologists, Obstetricians, Residents, Non-specific              | Argentina        |
| (Sreedharan <i>et al.</i> 2010)    | 35       | Cross-sectional-Quantitative                    | Nurses                                                             | U.A.E            |
| (Trasande <i>et al.</i> 2010)      | 36       | Cross-sectional-Systematic review               | Pediatricians, General practitioners                               | Michigan—U.S.A   |
| (Abbas and Alghobashy 2012)        | 37       | Cross-sectional-(Before and After) Quantitative | Pediatrician                                                       | Zagazig—Egypt    |
| (Huang <i>et al.</i> 2013)         | 38       | Cross-sectional-Quantitative                    | Physicians                                                         | Qingdao—China    |
| (Kruger <i>et al.</i> 2012)        | 39       | Cross-sectional-Quantitative                    | Obstetricians, Gynecologists, Pediatricians, General Practitioners | U.S.A            |
| (Roberts <i>et al.</i> 2013)       | 40       | Cross-sectional (Before and After) Quantitative | Pediatricians                                                      | U.S.A            |
| (Blaine <i>et al.</i> 2014)        | 41       | Cross-sectional-Quantitative                    | Nurses                                                             | U.S.A            |
| (Stotland <i>et al.</i> 2014)      | 42       | Cross-sectional-Mixed                           | Obstetricians                                                      | California—USA   |
| (Trasande <i>et al.</i> 2014)      | 43       | Cross-sectional-Quantitative                    | Pediatricians                                                      | Northwest—China  |

**Table S2.** Showing type of exposures assessed and type of exposures most/least discussed by clinicians with their clients.

| Author # | Exposures Assessed                                                                                                                                                                                                                                  | Exposures Most Discussed by Clinicians                                | Exposures Least Discussed by Clinicians                                                         |
|----------|-----------------------------------------------------------------------------------------------------------------------------------------------------------------------------------------------------------------------------------------------------|-----------------------------------------------------------------------|-------------------------------------------------------------------------------------------------|
| 1        | Allergens, carcinogens, Electromagnetic fields, food, hormones, industrial waste, metals, PCBs, pesticides, radiation, solvents, water                                                                                                              | drinking water, allergens, food, industrial waste, pesticides         | hormones, PCPs, EM, radiation                                                                   |
| 2        | Pesticides                                                                                                                                                                                                                                          | n/a                                                                   | n/a                                                                                             |
| 3        | Lead, tobacco smoke, occupation, radon, car seat use, toxins, allergens, household exposures                                                                                                                                                        | Tobacco Smoke, lead poisoning, occupation, car seat use               | hobbies, radon                                                                                  |
| 4        | Tobacco Smoke                                                                                                                                                                                                                                       | n/a                                                                   | n/a                                                                                             |
| 5        | Occupational exposures                                                                                                                                                                                                                              | n/a                                                                   | n/a                                                                                             |
| 6        | Environment & health                                                                                                                                                                                                                                | n/a                                                                   | n/a                                                                                             |
| 7        | Tobacco Smoke, pets, water, lead, housing, sun, television, occupation, molds, heat, air pollution, hobbies, carbon monoxide                                                                                                                        | Tobacco Smoke, water, lead, housing, molds, heat, air pollution       | carbon monoxide, hobbies, outdoor air, sun, nitrates, radiation, asbestos, PCBs, HG, pesticides |
| 8        | Tobacco Smoke                                                                                                                                                                                                                                       | n/a                                                                   | n/a                                                                                             |
| 9        | Tobacco Smoke                                                                                                                                                                                                                                       |                                                                       |                                                                                                 |
| 10       | Arsenic                                                                                                                                                                                                                                             | n/a                                                                   | n/a                                                                                             |
| 11       | Sun Exposure                                                                                                                                                                                                                                        | Smoking                                                               | Sun protection                                                                                  |
| 12       | Air pollution                                                                                                                                                                                                                                       | n/a                                                                   | n/a                                                                                             |
| 13       | Tobacco Smoke, occupation, nutrition, sun, pets, outdoor pollution, hobbies, housing, pesticides, lead, water, radiation, asbestos, fetal exposures, herbicides, heat source, indoor pollution, emissions, mercury, nitrates, agent orange, Arsenic | Tobacco Smoke, nutrition, occupation                                  | housing, hobbies, fetal exposures, drinking water,                                              |
| 14       | Tobacco Smoke                                                                                                                                                                                                                                       | n/a                                                                   | n/a                                                                                             |
| 15       | Tobacco Smoke                                                                                                                                                                                                                                       | n/a                                                                   | n/a                                                                                             |
| 16       | Pesticides                                                                                                                                                                                                                                          | n/a                                                                   | n/a                                                                                             |
| 17       | Indoor air pollution, outdoor air pollution, allergens (pollen, dust, molds), tobacco smoke, medications, pesticides, mercury, other metals, dioxins, bacteria, electronics, sunlight, household exposures, antibiotics, hormones                   | Tobacco Smoke, air pollution, allergens, pesticides, industrial waste | radiation from electronics, GM foods                                                            |
| 18       | Bioterrorism, air quality, environmental toxins, anthrax, nuclear event, potassium iodide                                                                                                                                                           | n/a                                                                   | n/a                                                                                             |
| 19       | Pesticides                                                                                                                                                                                                                                          | n/a                                                                   | n/a                                                                                             |

Table S2. *Cont.*

| Author # | Exposures Assessed                                                                                                                                                                                                                                                                                                                                                                                                     | Exposures Most Discussed by Clinicians                                                | Exposures Least Discussed by Clinicians             |
|----------|------------------------------------------------------------------------------------------------------------------------------------------------------------------------------------------------------------------------------------------------------------------------------------------------------------------------------------------------------------------------------------------------------------------------|---------------------------------------------------------------------------------------|-----------------------------------------------------|
| 20       | Noise, passive smoking, air pollution, benzene,; radon; ELF; EMF                                                                                                                                                                                                                                                                                                                                                       | occupational exposures, indoor and outdoor<br>air pollution, tobacco Smoke, allergens | radon, domestic heating                             |
| 21       | Pesticides, lead, mercury, mold                                                                                                                                                                                                                                                                                                                                                                                        | n/a                                                                                   | n/a                                                 |
| 22       | Diet/nutrition, behavior/development, tobacco smoke, pets, lead, sun exposure,<br>parents/teens` occupations, home injury prevention, housing age r type, firearms in<br>the home, Indoor air pollution, water quality, heat source in the home, hobbies,<br>molds, carbon monoxide, insecticide, pesticides, mercury, PCB`s, Asbestos,<br>radiation exposure, nitrates, radon, Arsenic, VOC, formaldehyde, phthalates | Tobacco Smoke, lead, sun, occupations                                                 | Phthalates, formaldehyde, VOCs. Arsenic,<br>radon   |
| 23       | Tobacco Smoke                                                                                                                                                                                                                                                                                                                                                                                                          | n/a                                                                                   | n/a                                                 |
| 24       | Tobacco Smoke                                                                                                                                                                                                                                                                                                                                                                                                          | n/a                                                                                   | n/a                                                 |
| 25       | Tobacco Smoke                                                                                                                                                                                                                                                                                                                                                                                                          | n/a                                                                                   | n/a                                                 |
| 26       | Indoor air pollution, environmental tobacco smoke, mold, contaminated water,<br>smog, organic solvents, soil, lead, mercury in fish, anesthetic gases                                                                                                                                                                                                                                                                  | air pollution, tobacco smoke, mold,<br>contaminated water, smog                       | contaminated soil, lead, mercury                    |
| 27       | Tobacco Smoke                                                                                                                                                                                                                                                                                                                                                                                                          | n/a                                                                                   | n/a                                                 |
| 28       | Radon                                                                                                                                                                                                                                                                                                                                                                                                                  | n/a                                                                                   | n/a                                                 |
| 29       | Tobacco Smoke, sun exposure, lead exposure, housing age/type, firearms in home,<br>pets in home, parent/teen occupation, water quality, home injury prevention devices                                                                                                                                                                                                                                                 | Tobacco Smoke, sun exposure, lead<br>exposure, housing, firearms, pets                | carbon monoxide, dust mites, mold, air<br>pollution |
| 30       | Tobacco Smoke                                                                                                                                                                                                                                                                                                                                                                                                          |                                                                                       |                                                     |
| 31       | Tobacco Smoke                                                                                                                                                                                                                                                                                                                                                                                                          | n/a                                                                                   | n/a                                                 |
| 32       | Tobacco Smoke                                                                                                                                                                                                                                                                                                                                                                                                          | n/a                                                                                   | n/a                                                 |
| 33       | Electromagnetic radiation                                                                                                                                                                                                                                                                                                                                                                                              | n/a                                                                                   | n/a                                                 |
| 34       | Tobacco Smoke                                                                                                                                                                                                                                                                                                                                                                                                          | n/a                                                                                   | n/a                                                 |
| 35       | Tobacco Smoke                                                                                                                                                                                                                                                                                                                                                                                                          | n/a                                                                                   | n/a                                                 |
| 36       | Lead, mold, Carbon monoxide, tobacco smoke, mercury, poor water quality,<br>mercury, poor air quality, pesticides, PCB`s or other organic compounds<br>Tobacco Smoke, pesticides, zoonotic, molds, household exposures, wastes,                                                                                                                                                                                        | PCB's, mercury, pesticides, carbon monoxide,<br>poor water quality,                   | lead, mold,                                         |
| 37       | radiation, water and food contamination, occupation& lifestyle, specific toxic<br>chemicals                                                                                                                                                                                                                                                                                                                            | n/a                                                                                   | n/a                                                 |

**Table S2. Cont.**

| Author # | Exposures Assessed                                                                                                                                                                                                                                                                                     | Exposures Most Discussed by Clinicians                     | Exposures Least Discussed by Clinicians                         |
|----------|--------------------------------------------------------------------------------------------------------------------------------------------------------------------------------------------------------------------------------------------------------------------------------------------------------|------------------------------------------------------------|-----------------------------------------------------------------|
| 38       | Tobacco smoke                                                                                                                                                                                                                                                                                          | n/a                                                        | n/a                                                             |
| 39       | Tobacco Smoke                                                                                                                                                                                                                                                                                          | n/a                                                        | n/a                                                             |
| 40       | Tobacco smoke, animal allergens, mold exposure, insects, air pollution, indoor chemicals, dust mites                                                                                                                                                                                                   | Tobacco Smoke, allergens                                   | indoor chemical use, wood smoke, air pollution, dust mite, mold |
| 41       | Tobacco Smoke                                                                                                                                                                                                                                                                                          | n/a                                                        | n/a                                                             |
| 42       | Tobacco Smoke, alcohol, diet/nutrition, weight gain, job/workplace, violence, pets, seat belt use, mercury, lead, insecticides, pesticides, air pollution, VOC's, molds, PCBs, Phthalates, BPA                                                                                                         | tobacco Smoke, alcohol, nutrition, weight gain             | phthalates, BPA, PCBs, molds, VOC's                             |
| 43       | Behavior, diet, development, immunizations, window guards, hobbies, housing, lead, parent occupation, tobacco Smoke, heat source, asbestos, pets, carbon monoxide, radon mold, dust mites, renovation, air pollution, PCB, pesticides, VOC's, nitrates, Hg, phthalates, arsenic, sun, water, radiation | diet, air pollution, pesticides, renovation, tobacco Smoke | radon, arsenic, PCBs, mercury, phthalate, VOC's, radiation      |

**Table S3.** Proportion of clinicians responding to questionnaire items on attitude/belief, practice patterns and self-competence.

| Author # | Attitude/Belief                                |                                                                                   |                                                                              |                                                             | Practice                                                        |                                                                                 | Self-Competence                                  |                                                   |
|----------|------------------------------------------------|-----------------------------------------------------------------------------------|------------------------------------------------------------------------------|-------------------------------------------------------------|-----------------------------------------------------------------|---------------------------------------------------------------------------------|--------------------------------------------------|---------------------------------------------------|
|          | Environmental exposure(s) affects human health | Environmental exposure history taking should be part of regular clinical practice | Counselling of patients on Environmental exposures can help reduce exposures | Includes routine environmental exposure history in practice | Includes environmental exposure counselling in routine practice | Refers/would refer cases associated with environmental exposures to specialists | Sufficiently informed on environmental exposures | Can effectively take environmental health history |
| 1        | Most agreed                                    | Few agreed                                                                        | n/a                                                                          | n/a                                                         | n/a                                                             | n/a                                                                             | n/a                                              | n/a                                               |
| 2        | Most agreed                                    | n/a                                                                               | n/a                                                                          | n/a                                                         | n/a                                                             | n/a                                                                             | n/a                                              | n/a                                               |
| 3        | n/a                                            | n/a                                                                               | n/a                                                                          | Most clinicians                                             | n/a                                                             | n/a                                                                             | n/a                                              | n/a                                               |
| 4        | n/a                                            | n/a                                                                               | Most agreed                                                                  | Most clinicians                                             | Most clinicians                                                 | Few clinicians                                                                  | Few clinicians                                   | n/a                                               |
| 5        | n/a                                            | n/a                                                                               | n/a                                                                          | n/a                                                         | n/a                                                             | n/a                                                                             | n/a                                              | Most clinicians                                   |
| 6        | Most agreed                                    | Few agreed                                                                        | n/a                                                                          | n/a                                                         | n/a                                                             | n/a                                                                             | Few clinicians                                   | n/a                                               |
| 7        | Most agreed                                    | Most agreed                                                                       | Most agreed                                                                  | Most clinicians                                             | Most clinicians                                                 | n/a                                                                             | Few clinicians                                   | Few clinicians                                    |
| 8        | n/a                                            | n/a                                                                               | n/a                                                                          | n/a                                                         | n/a                                                             | n/a                                                                             | Most clinicians                                  | Most clinicians                                   |
| 9        | n/a                                            | n/a                                                                               | n/a                                                                          | Few clinicians                                              | Most clinicians                                                 | n/a                                                                             | n/a                                              | n/a                                               |

Table S3. *Cont.*

| Author # | Attitude/Belief                                |                                                                                   |                                                                              |                                                             | Practice                                                        |                                                                                 | Self-Competence                                  |                                                   |
|----------|------------------------------------------------|-----------------------------------------------------------------------------------|------------------------------------------------------------------------------|-------------------------------------------------------------|-----------------------------------------------------------------|---------------------------------------------------------------------------------|--------------------------------------------------|---------------------------------------------------|
|          | Environmental exposure(s) affects human health | Environmental exposure history taking should be part of regular clinical practice | Counselling of patients on Environmental exposures can help reduce exposures | Includes routine environmental exposure history in practice | Includes environmental exposure counselling in routine practice | Refers/would refer cases associated with environmental exposures to specialists | Sufficiently informed on environmental exposures | Can effectively take environmental health history |
| 10       | Most agreed                                    | n/a                                                                               | n/a                                                                          | n/a                                                         | n/a                                                             | n/a                                                                             | Few clinicians                                   | Few clinicians                                    |
| 11       | Most agreed                                    | n/a                                                                               | Most agreed                                                                  | n/a                                                         | Few clinicians                                                  | n/a                                                                             | n/a                                              | n/a                                               |
| 12       | Few agreed                                     | n/a                                                                               | n/a                                                                          | n/a                                                         | n/a                                                             | n/a                                                                             | n/a                                              | n/a                                               |
| 13       | Most agreed                                    | Most agreed                                                                       | Few agreed                                                                   | Most clinicians                                             | n/a                                                             | n/a                                                                             | n/a                                              | n/a                                               |
| 14       | n/a                                            | n/a                                                                               | n/a                                                                          | Few clinicians                                              | Few clinicians                                                  | n/a                                                                             | n/a                                              | n/a                                               |
| 15       | n/a                                            | n/a                                                                               | n/a                                                                          | Most clinicians                                             | Most clinicians                                                 | n/a                                                                             | Most clinicians                                  | n/a                                               |
| 16       | n/a                                            | n/a                                                                               | n/a                                                                          | Few clinicians                                              | n/a                                                             | n/a                                                                             | Few clinicians                                   | n/a                                               |
| 17       | n/a                                            | n/a                                                                               | n/a                                                                          | n/a                                                         | n/a                                                             | n/a                                                                             | n/a                                              | n/a                                               |
| 18       | n/a                                            | n/a                                                                               | n/a                                                                          | n/a                                                         | n/a                                                             | n/a                                                                             | Few clinicians                                   | n/a                                               |
| 19       | n/a                                            | n/a                                                                               | n/a                                                                          | Few clinicians                                              | n/a                                                             | n/a                                                                             | n/a                                              | n/a                                               |
| 20       | Most agreed                                    | n/a                                                                               | Most agreed                                                                  | Most clinicians                                             | n/a                                                             | n/a                                                                             | n/a                                              | n/a                                               |
| 21       | Most agreed                                    | Most agreed                                                                       | Most agreed                                                                  | Few clinicians                                              | Few clinicians                                                  | Most clinicians                                                                 | Most Clinicians                                  | few                                               |
| 22       | Most agreed                                    | Most agreed                                                                       | Most agreed                                                                  | Few clinicians                                              | Most clinicians                                                 | Most clinicians                                                                 | Most Clinicians                                  | n/a                                               |
| 23       | n/a                                            | n/a                                                                               | n/a                                                                          | Most clinicians                                             | Most clinicians                                                 | Few clinicians                                                                  | n/a                                              | n/a                                               |
| 24       | Most agreed                                    | n/a                                                                               | Most agreed                                                                  | Most clinicians                                             | Most clinicians                                                 | n/a                                                                             | Few clinicians                                   | n/a                                               |
| 25       | n/a                                            | n/a                                                                               | n/a                                                                          | n/a                                                         | n/a                                                             | n/a                                                                             | Few clinicians                                   | n/a                                               |
| 26       | Most agreed                                    | n/a                                                                               | n/a                                                                          | Most clinicians                                             | n/a                                                             | n/a                                                                             | Few clinicians                                   | n/a                                               |
| 27       | n/a                                            | n/a                                                                               | n/a                                                                          | Most clinicians                                             | Most clinicians                                                 | n/a                                                                             | n/a                                              | n/a                                               |
| 28       | n/a                                            | n/a                                                                               | n/a                                                                          | n/a                                                         | n/a                                                             | n/a                                                                             | Few clinicians                                   | n/a                                               |
| 29       | Most agreed                                    | Most agreed                                                                       | n/a                                                                          | Few clinicians                                              | Few clinicians                                                  | Most clinicians                                                                 | Most clinicians                                  | n/a                                               |
| 30       | n/a                                            | n/a                                                                               | Most agreed                                                                  | Most clinicians                                             | Most clinicians                                                 | n/a                                                                             | n/a                                              | n/a                                               |
| 31       | n/a                                            | n/a                                                                               | Most agreed                                                                  | Few clinicians                                              | Few clinicians                                                  | n/a                                                                             | n/a                                              | n/a                                               |
| 32       | n/a                                            | n/a                                                                               | Few agreed                                                                   | n/a                                                         | n/a                                                             | n/a                                                                             | n/a                                              | n/a                                               |

**Table S3. Cont.**

| Author # |                                                | Attitude/Belief                                                                   |                                                                              |                                                             | Practice                                                        |                                                                                 | Self-Competence                                  |                                                   |
|----------|------------------------------------------------|-----------------------------------------------------------------------------------|------------------------------------------------------------------------------|-------------------------------------------------------------|-----------------------------------------------------------------|---------------------------------------------------------------------------------|--------------------------------------------------|---------------------------------------------------|
|          | Environmental exposure(s) affects human health | Environmental exposure history taking should be part of regular clinical practice | Counselling of patients on Environmental exposures can help reduce exposures | Includes routine environmental exposure history in practice | Includes environmental exposure counselling in routine practice | Refers/would refer cases associated with environmental exposures to specialists | Sufficiently informed on environmental exposures | Can effectively take environmental health history |
| 33       | Most agreed                                    | n/a                                                                               | n/a                                                                          | n/a                                                         | n/a                                                             | n/a                                                                             | n/a                                              | n/a                                               |
| 34       | n/a                                            | n/a                                                                               | n/a                                                                          | Most clinicians                                             | Most clinicians                                                 | n/a                                                                             | Few clinicians                                   | n/a                                               |
| 35       | Most agreed                                    | n/a                                                                               | Most agreed                                                                  | Most clinicians                                             | Most clinicians                                                 | n/a                                                                             | n/a                                              | n/a                                               |
| 36       | Most agreed                                    | Most agreed                                                                       | n/a                                                                          | n/a                                                         | n/a                                                             | Most clinicians                                                                 | Most clinicians                                  | n/a                                               |
| 37       | n/a                                            | Most agreed                                                                       | Most agreed                                                                  | Few clinicians                                              | n/a                                                             | n/a                                                                             | Most clinicians                                  | n/a                                               |
| 38       | Most agreed                                    | n/a                                                                               | n/a                                                                          | n/a                                                         | Few clinicians                                                  | n/a                                                                             | n/a                                              | n/a                                               |
| 39       | n/a                                            | n/a                                                                               | n/a                                                                          | n/a                                                         | Most clinicians                                                 | Few clinicians                                                                  | n/a                                              | n/a                                               |
| 40       | n/a                                            | n/a                                                                               | n/a                                                                          | n/a                                                         | Most clinicians                                                 | n/a                                                                             | Few clinicians                                   | n/a                                               |
| 41       | n/a                                            | n/a                                                                               | n/a                                                                          | Few clinicians                                              | Few clinicians                                                  | n/a                                                                             | n/a                                              | n/a                                               |
| 42       | Most agreed                                    | Most agreed                                                                       | Most agreed                                                                  | Most clinicians                                             | Most clinicians                                                 | n/a                                                                             | Most clinicians                                  | n/a                                               |
| 43       | Most agreed                                    | Most agreed                                                                       | Few agreed                                                                   | n/a                                                         | n/a                                                             | Most clinicians                                                                 | Few clinicians                                   |                                                   |

Note: \* n/a—Not Applicable.

**Table S4.** Showing proportion of clinicians responding to questionnaire items on clinician training and obstacles to practice.

| Author # |                                                       | Training                             |                                                                   | Support and Follow-up                                                                           |                                          | Obstacles to Practice                                                                           |
|----------|-------------------------------------------------------|--------------------------------------|-------------------------------------------------------------------|-------------------------------------------------------------------------------------------------|------------------------------------------|-------------------------------------------------------------------------------------------------|
|          | Prior training in environmental health history taking | Requires/interested in more training | Most helpful source for continuing environmental health education | Practitioners role in changing social, psychological and physiological environments of patients | Receives/requests feedback from patients |                                                                                                 |
| 1        | n/a                                                   | n/a                                  | n/a                                                               | n/a                                                                                             | n/a                                      | n/a                                                                                             |
| 2        | n/a                                                   | Most clinicians                      | n/a                                                               | n/a                                                                                             | n/a                                      | n/a                                                                                             |
| 3        | n/a                                                   | n/a                                  | n/a                                                               | n/a                                                                                             | n/a                                      | n/a                                                                                             |
| 4        | n/a                                                   | n/a                                  | n/a                                                               | n/a                                                                                             | n/a                                      | time, practice efficiency, patients response                                                    |
| 5        | n/a                                                   | n/a                                  | n/a                                                               | n/a                                                                                             | n/a                                      | Training, environmental data, Eh consultation services, laboratory support, financial incentive |

Table S4. *Cont.*

| Author # | Training                                              |                                      |                                                                   | Support and Follow-up                                                                           |                                          | Obstacles to Practice                                                                                   |
|----------|-------------------------------------------------------|--------------------------------------|-------------------------------------------------------------------|-------------------------------------------------------------------------------------------------|------------------------------------------|---------------------------------------------------------------------------------------------------------|
|          | Prior training in environmental health history taking | Requires/interested in more training | Most helpful source for continuing environmental health education | Practitioners role in changing social, psychological and physiological environments of patients | Receives/requests feedback from patients |                                                                                                         |
| 6        | Few clinicians                                        | Most clinicians                      | Environmental educational programs, internet; colleagues          | n/a                                                                                             | n/a                                      | training, time                                                                                          |
| 7        | Few clinicians                                        | n/a                                  | Agencies/associations, newsletter,                                | n/a                                                                                             | n/a                                      | n/a                                                                                                     |
| 8        | n/a                                                   | n/a                                  | n/a                                                               | n/a                                                                                             | n/a                                      | training                                                                                                |
| 9        | n/a                                                   | n/a                                  | n/a                                                               | n/a                                                                                             | n/a                                      | patients response, training, language, time, reimbursement                                              |
| 10       | Few clinicians                                        | n/a                                  | n/a                                                               | n/a                                                                                             | n/a                                      | Training, lack of knowledge, poor coordination                                                          |
| 11       | n/a                                                   | Most clinicians                      | n/a                                                               | n/a                                                                                             | n/a                                      | Time, patients response, lack of educational resource, lack of adequate reimbursement, lack of training |
| 12       | n/a                                                   | n/a                                  | n/a                                                               | n/a                                                                                             | n/a                                      | n/a                                                                                                     |
| 13       | Few clinicians                                        | Most clinicians                      | guidelines                                                        | n/a                                                                                             | n/a                                      | n/a                                                                                                     |
| 14       | n/a                                                   | n/a                                  | n/a                                                               | n/a                                                                                             | n/a                                      | n/a                                                                                                     |
| 15       | n/a                                                   | n/a                                  | n/a                                                               | n/a                                                                                             | n/a                                      | patients response, time                                                                                 |
| 16       | Most clinicians                                       | Most clinicians                      | texts; internet; colleague experts                                | n/a                                                                                             | n/a                                      | n/a                                                                                                     |
| 17       | n/a                                                   | Most clinicians                      | n/a                                                               | n/a                                                                                             | n/a                                      | resources, training                                                                                     |
| 18       | n/a                                                   | n/a                                  | n/a                                                               | n/a                                                                                             | n/a                                      | n/a                                                                                                     |
| 19       | Few clinicians                                        | Few clinicians                       | agencies, internet, colleagues                                    | n/a                                                                                             | n/a                                      | n/a                                                                                                     |
| 20       | n/a                                                   | Most clinicians                      | journals, continuing education                                    | n/a                                                                                             | n/a                                      | Time, patients concern, training, lack of appropriate reimbursement                                     |
| 21       | Few clinicians                                        | Most clinicians                      | n/a                                                               | n/a                                                                                             | n/a                                      | time, resources                                                                                         |
| 22       | Few clinicians                                        | Most clinicians                      | n/a                                                               | Most agreed                                                                                     | n/a                                      | n/a                                                                                                     |
| 23       | Few clinicians                                        | Most clinicians                      | n/a                                                               | n/a                                                                                             | Few clinicians                           | patients response, training, competing priorities, resources, time                                      |
| 24       | n/a                                                   | n/a                                  | n/a                                                               | n/a                                                                                             | Few clinicians                           | training, time, resources                                                                               |
| 25       | n/a                                                   | n/a                                  | n/a                                                               | n/a                                                                                             | n/a                                      | n/a                                                                                                     |

Table S4. *Cont.*

| Author # | Training                                              |                                      | Support and Follow-Up                                             |                                                                                                 | Obstacles to Practice                                          |
|----------|-------------------------------------------------------|--------------------------------------|-------------------------------------------------------------------|-------------------------------------------------------------------------------------------------|----------------------------------------------------------------|
|          | Prior training in environmental health history taking | Requires/interested in more training | Most helpful source for continuing environmental health education | Practitioners role in changing social, psychological and physiological environments of patients | Receives/requests feedback from patients                       |
| 26       | Few clinicians                                        | n/a                                  | journals, internet, workshops, conferences                        | n/a                                                                                             | n/a                                                            |
| 27       | Few clinicians                                        | n/a                                  | n/a                                                               | n/a                                                                                             | n/a                                                            |
| 28       | n/a                                                   | n/a                                  | n/a                                                               | n/a                                                                                             | n/a                                                            |
| 29       | Few clinicians                                        | Most clinicians                      | journals, lectures, agencies, presentations                       | n/a                                                                                             | n/a                                                            |
| 30       | Most clinicians                                       | Most clinicians                      | n/a                                                               | n/a                                                                                             | resources (referral centers)                                   |
| 31       | n/a                                                   | Most clinicians                      | n/a                                                               | n/a                                                                                             | time, reaching fathers and socially vulnerable families        |
| 32       | Most clinicians                                       | n/a                                  | n/a                                                               | n/a                                                                                             | patients response, resources, training                         |
| 33       | Few clinicians                                        | n/a                                  | n/a                                                               | n/a                                                                                             | n/a                                                            |
| 34       | Few clinicians                                        | n/a                                  | n/a                                                               | n/a                                                                                             | n/a                                                            |
| 35       | Few clinicians                                        | Most clinicians                      | n/a                                                               | n/a                                                                                             | n/a                                                            |
| 36       | Few clinicians                                        | Most clinicians                      | n/a                                                               | n/a                                                                                             | time, interest, patients response, resources(referral centers) |
| 37       | n/a                                                   | n/a                                  | Textbooks, guideline; internet, conferences, journals             | n/a                                                                                             | n/a                                                            |
| 38       | Few clinicians                                        | n/a                                  | n/a                                                               | n/a                                                                                             | time, training                                                 |
| 39       | n/a                                                   | n/a                                  | n/a                                                               | n/a                                                                                             | n/a                                                            |
| 40       | n/a                                                   | n/a                                  | n/a                                                               | n/a                                                                                             | n/a                                                            |

Table S4. *Cont.*

| Author # | Training                                              |                                      |                                                                   | Support and Follow-up                                                                           |                                          | Obstacles to Practice                                    |
|----------|-------------------------------------------------------|--------------------------------------|-------------------------------------------------------------------|-------------------------------------------------------------------------------------------------|------------------------------------------|----------------------------------------------------------|
|          | Prior training in environmental health history taking | Requires/interested in more training | Most helpful source for continuing environmental health education | Practitioners role in changing social, psychological and physiological environments of patients | Receives/requests feedback from patients |                                                          |
| 41       | n/a                                                   | n/a                                  | n/a                                                               | n/a                                                                                             | n/a                                      | Training, patients concern                               |
| 42       | Few clinicians                                        | n/a                                  | Agencies, Internet                                                | Few agreed                                                                                      | n/a                                      | Lack of knowledge, patients concern, complexity of topic |
| 43       | Few clinicians                                        | n/a                                  | n/a                                                               | n/a                                                                                             | n/a                                      | n/a                                                      |

Note: \* n/a—Not Applicable.
